# Supplementary material for: The effectiveness of battlefield acupuncture in addition to standard physical therapy treatment after shoulder surgery: a protocol for a randomized clinical trial
Source: Springer Nature journal article supplement (doi:10.1186/s13063-020-04909-8), 2020-12-01

# Appendix 2 – Battlefield Acupuncture Intervention

## 1. Cingulate Gyrus

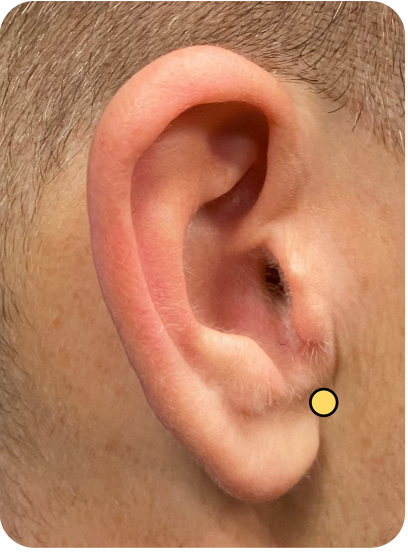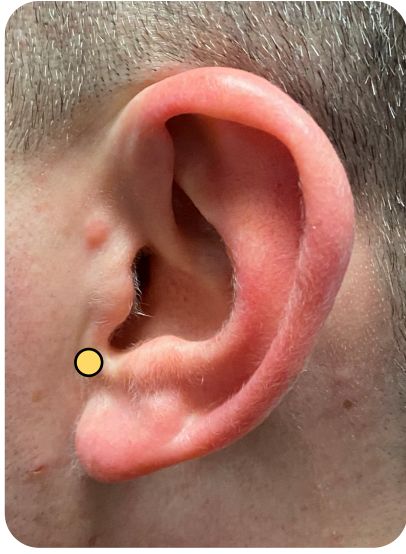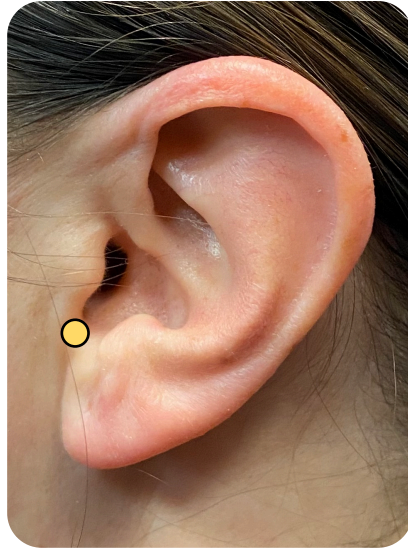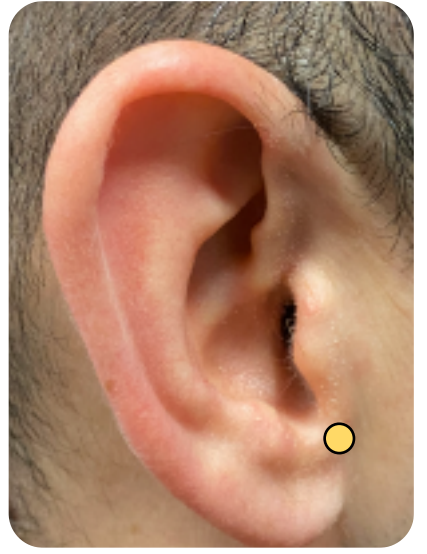

## 2. Thalamus

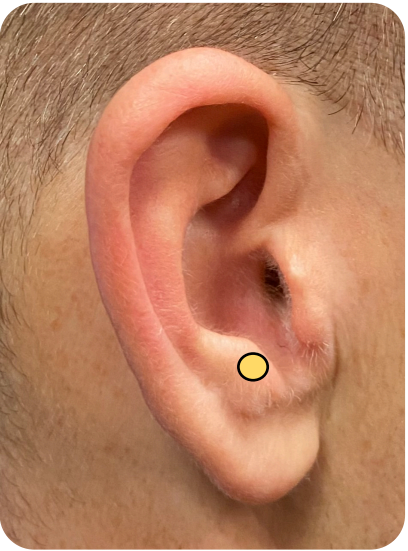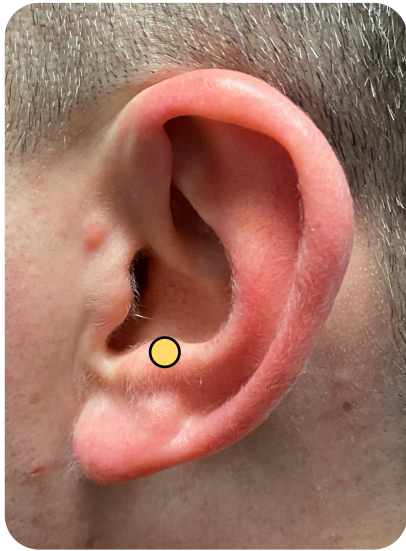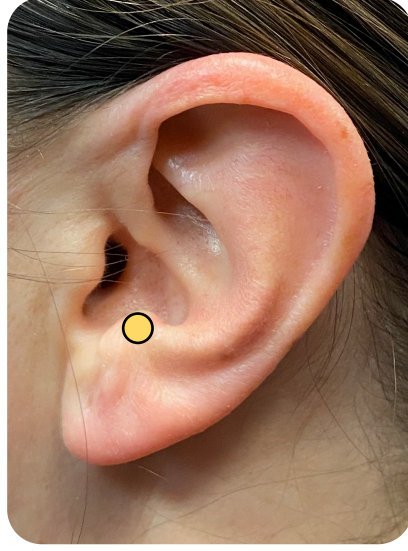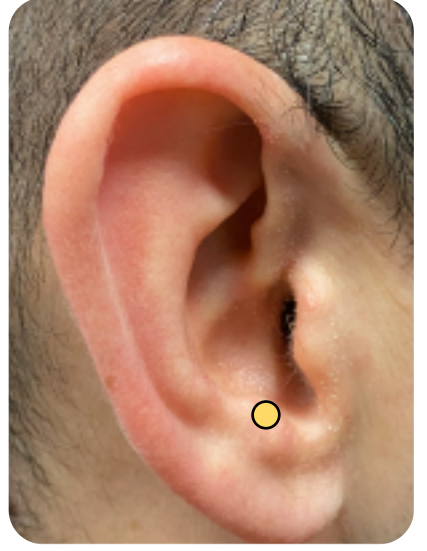

## 3. Omega 2

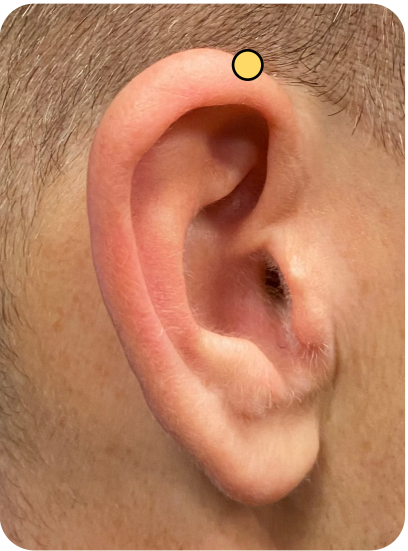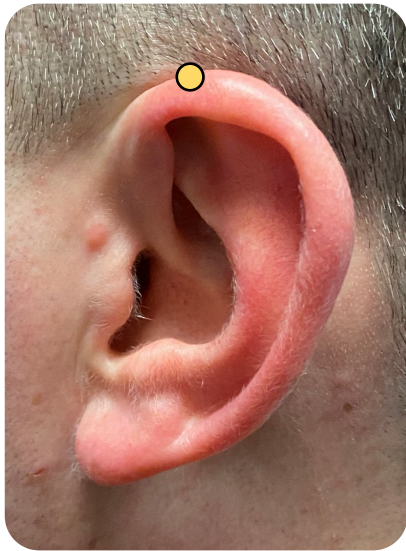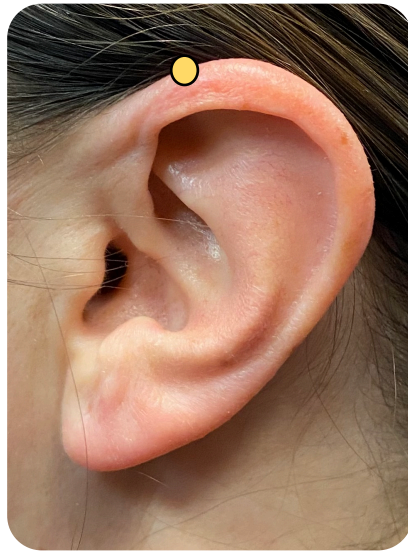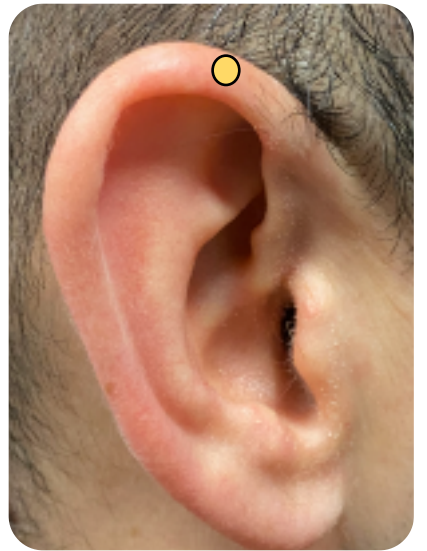

## 4. Point Zero

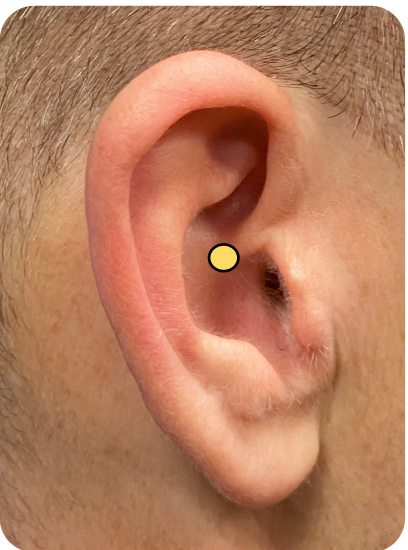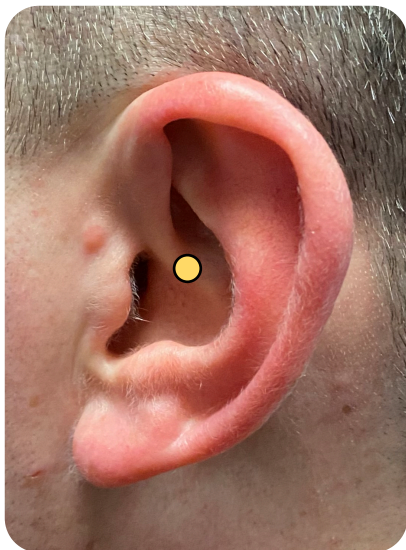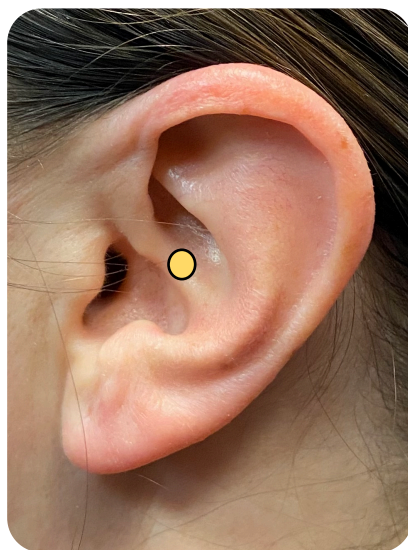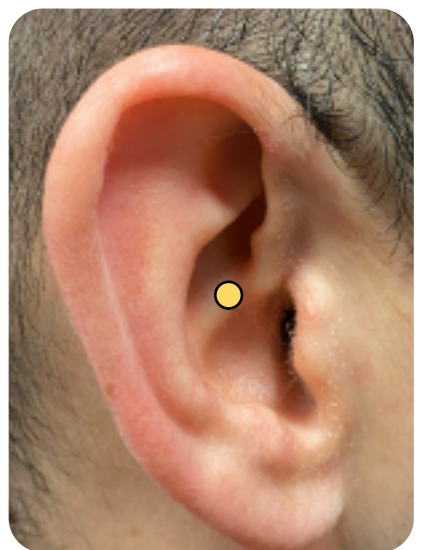

## 5. Shen Men

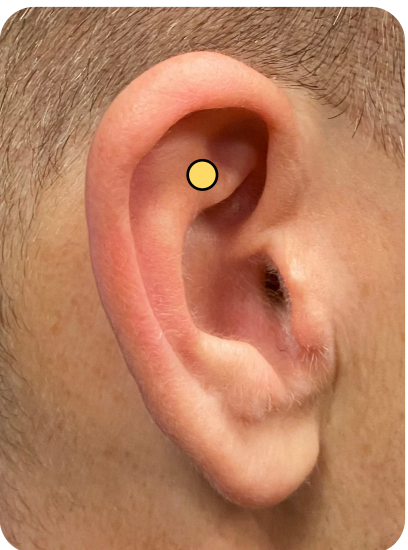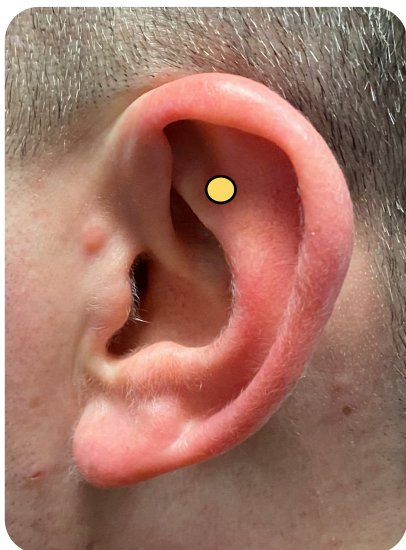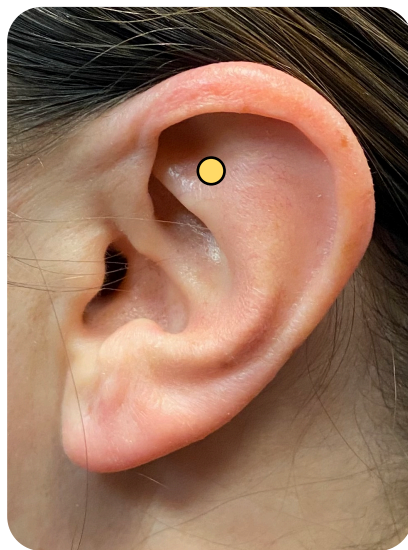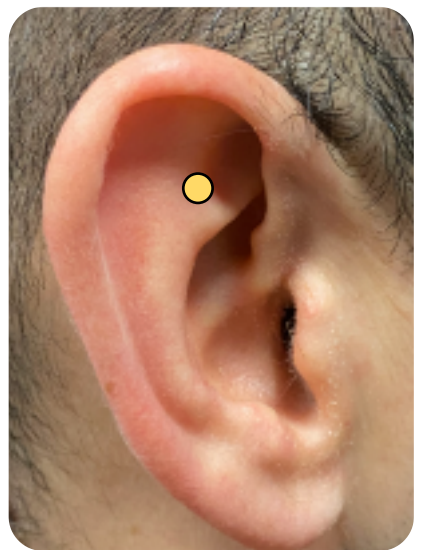

Supplement: MOESM3 [file 18654006]
