# Supplementary material for: The effectiveness of battlefield acupuncture in addition to standard physical therapy treatment after shoulder surgery: a protocol for a randomized clinical trial
Source: Springer Nature journal article supplement (doi:10.1186/s13063-020-04909-8), 2020-12-01
Supplement: MOESM2 [file 18654006]

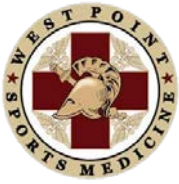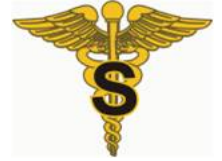

## SHOULDER RECONSTRUCTION REHABILITATION GUIDELINES (Bankart Repair, Anterior Capsulorrhaphy)

### PHASE I: Generally 0 - 6 weeks post-op

**PHASE I GOALS:** Protect the surgical repair & avoid a “stiff” shoulder

**PRECAUTIONS:** \***NO** active use of arm - must **ALWAYS** wear sling/immobilizer, even while sleeping\*

**ROM GUIDELINES:** Avoid gaining ROM too quickly by adhering to the following:

- Wks 1-3: limit flexion to 90° and external rotation to 30° (neutral)
- Wks 4-6: limit flexion to 135° and external rotation to 50°

**SLING:** Sling/immobilizer with abduction pillow is worn for 6 weeks per ortho/PT

**WOUND:** Post-op dressing remains intact until post-op day #2 (~48 hours after surgery)  
May begin showering after post-op day #2 (no need to cover incision site)

\***Do NOT** submerge shoulder in tub or pool for 4 weeks\*

Suture/staple removal @ 10-14 days per Ortho/PT

Begin scar massage after incision site sloughs/scar is formed

**REHABILITATION:** \*Note: Exercise prescription is dependent upon the tissue healing process and *individual* functional readiness in *all* stages. If any concerns or complications arise regarding the progress for any patient, physical therapy will contact the orthopedic surgeon.  
Start with the following exercises:

**Modified Pendulum:** (May be done in the sling.) While supporting the affected arm with the unaffected hand, move the shoulder forward, backward, side to side and in clockwise and counterclockwise directions. Progress to full pendulum after 3-5 days.

**Supine Assisted Shoulder Flexion:** Lie on back with arm down at side and thumb pointed towards the ceiling. Use unaffected hand to grasp the wrist of the affected arm and slowly raise it until a point of mild discomfort (within ranges of motion described above).

**Elbow, Wrist, & Hand:** Perform elbow and wrist flexion, extension, pronation, and supination while holding the shoulder in a neutral position at side. For the hand, use a foam ball, newspaper, or theraputty to squeeze repetitively.

**Gentle (“Two Finger”) Isometrics:** Use the unaffected hand to provide very light, pain free resistance during shoulder flexion, adduction, extension, and abduction (No rotation).  
-Add gentle, pain free resistance for IR & ER starting weeks 3-4

**Aerobic Conditioning on Recumbent Bike:** \*Sling must be worn\*

**Scapular Retraction & Protraction:** Gently “pinch” shoulder blades together. Hold for 5 seconds and relax. Then spread shoulder blades apart. Hold for 5 seconds and relax.

**Shoulder AAROM exercises:** Wand, pulley, gentle towel stretch, etc.

**Lower Extremity Weight Lifting:** May begin at 5-6 weeks

**FOLLOW-UP:** Physical Therapy: weekly; Ortho: ~6 wks post-op; Supervised rehab: 1-2 x per wk

**DOCUMENTATION:** Precautions, pain level, medications and modalities  
Observation: (incision sites) - Signs/symptoms of infection? Site healing well?  
Neurovascular status: Distal pulses, motor and sensation intact?  
Shoulder passive ROM (forward flexion, ER with shoulder at side)

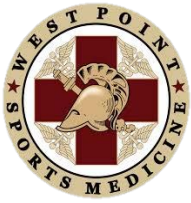

Keller Army Community Hospital  
United States Military Academy, West Point, New York

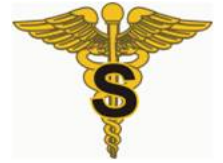

## SHOULDER LATARJET REHABILITATION GUIDELINES

### PHASE I: Generally 0 - 6 weeks post-op (Immediate Post Surgical Phase)

**PHASE I GOALS:** Protect the surgical repair & avoid a “stiff” shoulder  
Adherence to precautions and immobilization

**PRECAUTIONS:** \***NO** active use of arm - must **ALWAYS** wear sling/immobilizer, even while sleeping\*  
Reminder it takes 6-8 wks to form osseous union for newly reconstructed glenoid  
Biceps and Coracobrachialis attachments to the coracoid need to be protected

**ROM GUIDELINES:** Avoid gaining ROM too quickly by adhering to the following:

- Wks 1-3: PROM Flexion 100deg, IR 45deg, ER 25deg, Abduction Tolerance
- Wks 4-6: PROM Flexion & Abduction Tolerance, IR 45deg at 30deg ABD, ER 45deg

**SLING:** Sling/immobilizer with abduction pillow is worn for 6 weeks per ortho/PT  
Sleep with towel under the elbow to prevent shoulder hyperextension/wear sling

**WOUND:** Post-op dressing remains intact until post-op day #2 (~48 hours after surgery)  
May begin showering after post-op day #2 (no need to cover incision site)  
\*Do **NOT** submerge shoulder in tub or pool for 4 weeks\*  
Suture/staple removal @ 10-14 days per Ortho/PT

Begin scar massage after incision site sloughs/scar is formed

**REHABILITATION:** \*Note: Exercise prescription is dependent upon the tissue healing process and *individual* functional readiness in *all* stages. If any concerns or complications arise regarding the progress for any patient, physical therapy will contact the orthopedic surgeon.  
Start with the following exercises: (10-20 repetitions, 3-4 x daily)

**~weeks 1-3** **Modified Pendulum:** (May be done in the sling.) While supporting the affected arm with the unaffected hand, move the shoulder forward, backward, side to side and in clockwise and counterclockwise directions. Progress to full pendulum after 3-5 days.

**Elbow, Wrist, & Hand:** Perform elbow and wrist flexion, extension, pronation, and supination while holding the shoulder in a neutral position at side. For the hand, use a foam ball, newspaper, or theraputty to squeeze repetitively.

**Gentle (“Two Finger”) Isometrics:** Use the unaffected hand to provide very light, pain free resistance during shoulder flexion, adduction, extension, and abduction (No rotation).

**Gentle (“Two Finger”) Isometrics:** add gentle, pain free resistance for IR & ER

**Shoulder PROM:** Do not force any painful motion.  
Flexion and elevation to 100 deg  
Abduction in the plane of the scapula to tolerance  
Internal Rotation (IR) to 45 degrees at 30 degrees of abduction  
External Rotation (ER) in the plane of the scapula from 0-25 degrees; begin at 30-40 degrees abduction

## SHOULDER LATARJET REHABILITATION GUIDELINES

### ~weeks 4-6 **Shoulder PROM:**

Flexion and elevation to tolerance

Abduction in the plane of the scapula to tolerance

IR to 45 degrees at 30 degrees abduction

ER to 45 deg. Begin at 30-40 degrees of abduction

**Joint Mobilization Grade I & II:** Only if limited ROM compared to expectation for this level

**Scapulothoracic Mobilization:** Only if limited ROM

**Thoracic spine Mobilization:** Only if limited ROM

**Posterior Capsule stretching:** Cross body stretch, Sleeper Stretch

**FOLLOW-UP:** Physical Therapy: weekly; Ortho: ~6 wks post-op; Supervised rehab: 2 x per wk

**DOCUMENTATION:** Precautions, pain level, medications and modalities

Observation: (incision sites) - Signs/symptoms of infection? Site healing well?

Neurovascular status: Distal pulses, motor and sensation intact?

Shoulder passive ROM (forward flexion, ER with shoulder at side)
